# Supplementary material for: Analytical Performance Specifications for 25-Hydroxyvitamin D Examinations
Source: PubMed Central journal article supplement (PMC7911223; doi:10.3390/nu13020431), 2021-01-28
Supplement: nutrients-13-00431-s001.pdf [file nutrients-13-00431-s001.pdf]

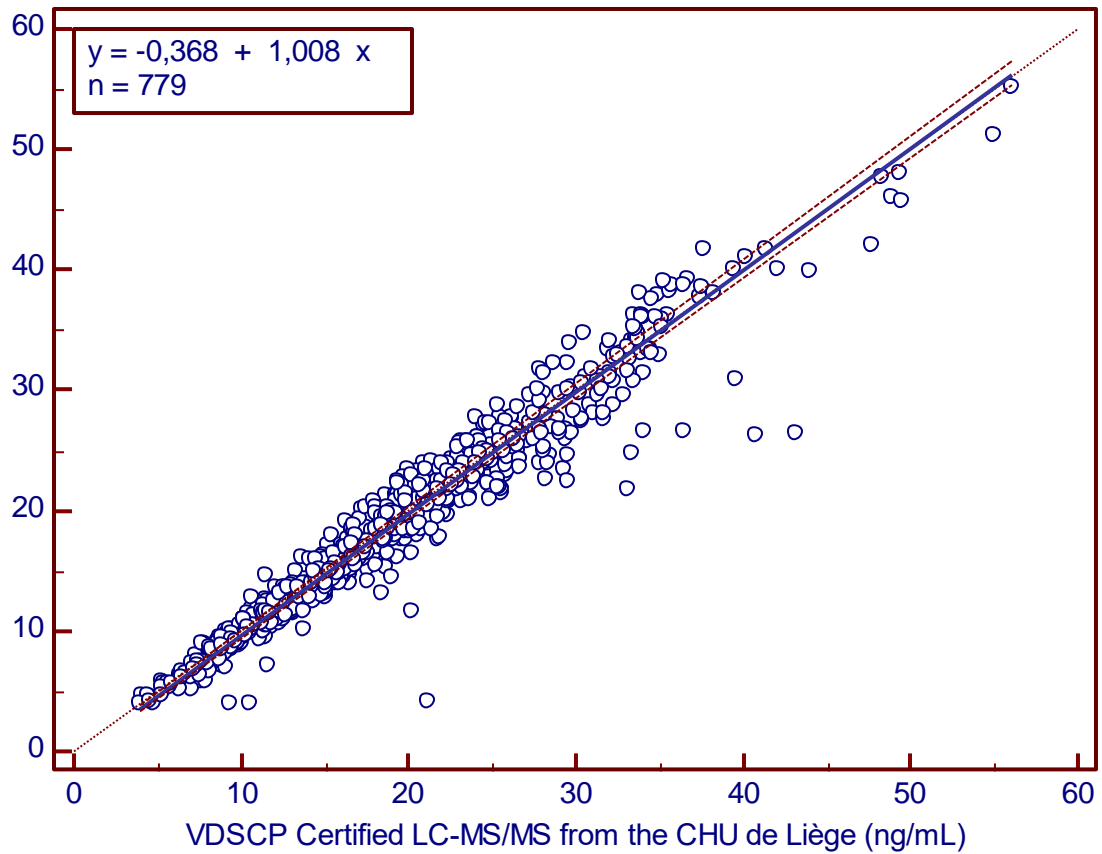

**Supplementary Figure S1.** Passing-Bablok regression of 25(OH)D values (ng/mL) obtained with the Fujirebio Lumipulse and the VDSCP-certified LC-MS/MS of the CHU de Liège. 25(OH)D: twenty-five-hydroxy vitamin D; VDSCP: Vitamin D Standardization-Certification Program; LC-MS/MS: liquid chromatography tandem mass spectrometry.
